# Supplementary material for: First Integrative Morphological and Genetic Characterization of Tremoctopus violaceus sensu stricto in the Mediterranean Sea
Source: MDPI journal article supplement (doi:10.3390/ani12010080), 2021-12-30
Supplement: s1 [file s1]

**Table S1:** Details of the COI and 16S sequences analysed in this study

| Gene    | GenBank Accession | BOLD Accession | Submitted as                 | Clade | Sampling Location                   | Reference                          |
|---------|-------------------|----------------|------------------------------|-------|-------------------------------------|------------------------------------|
| COI     | OM025233          | pending        | <i>Tremoctopus violaceus</i> | B     | Apulia, Italy —Mediterranean Sea    | present study                      |
| COI     | AF377978          | GBCPH0220-06   | <i>Tremoctopus violaceus</i> | A     | Florida, U.S.A. — Atlantic Ocean    | [55]                               |
| COI,16S | KY649286          | GBML12075-19   | <i>Tremoctopus violaceus</i> | A     | Taiwan — Pacific Ocean              | [56]                               |
| COI     | MH379648          | GBML35597-19   | <i>Tremoctopus gracilis</i>  | A     | India — Indian Ocean                | Geetha <i>et al.</i> , unpublished |
| COI     | MN443917          | GBMNB71454-20  | <i>Tremoctopus violaceus</i> | A     | South Korea — Pacific Ocean         | Kim, unpublished                   |
| COI     | MW025168          | GBMND9913-21   | <i>Tremoctopus violaceus</i> | A     | South Korea — Pacific Ocean         | Oh <i>et al.</i> , unpublished     |
| COI     | MK186001          | KERCE079-17    | <i>Tremoctopus robsoni</i>   | C     | New Zealand — Pacific Ocean         | [52]                               |
| COI     | MN560197          | GBMNC27345-20  | <i>Tremoctopus sp.</i>       | C     | Chile — Pacific Ocean               | [57]                               |
| COI     | ---               | CEPHW173-11    | Octopoda                     | A     | Japan — Pacific Ocean               | Finn & Steinke, unpublished        |
| COI     | ---               | CEPHW176-11    | Octopoda                     | A     | Japan — Pacific Ocean               | Finn & Steinke, unpublished        |
| 16S     | OM025092          | ---            | <i>Tremoctopus violaceus</i> | B     | Sardinia, Italy — Mediterranean Sea | present study                      |
| 16S     | OM025093          | ---            | <i>Tremoctopus violaceus</i> | B     | Sardinia, Italy — Mediterranean Sea | present study                      |
| 16S     | OM025094          | ---            | <i>Tremoctopus violaceus</i> | B     | Apulia, Italy — Mediterranean Sea   | present study                      |
| 16S     | MT271737          | ---            | <i>Tremoctopus violaceus</i> | B     | Mexico — Atlantic Ocean             | [3]                                |
| 16S     | AJ252767          | ---            | <i>Tremoctopus violaceus</i> | A     | Hawaii — Pacific Ocean              | Hudelot, unpublished               |
| 16S     | MN435565          | ---            | <i>Tremoctopus violaceus</i> | A     | South Korea — Pacific Ocean         | Kim, unpublished                   |
